# Supplementary material
Source: PubMed Central journal article supplement (PMC3084082)
Supplement: 1102891108_pnas.201102891SI.pdf [file 1102891108_pnas.201102891SI.pdf]

# Supporting Information

Desurmont et al. 10.1073/pnas.1102891108

Table S1. Mean plant wound response, plant traits, insect performance, and insect oviposition preference for *Viburnum* spp. of different continental origins

| Continental origin | Species                  | Plant wound response (%) |                  |                   | Plant traits       |                           | Insect performance      |                 | Oviposition preference (egg masses/twig) |
|--------------------|--------------------------|--------------------------|------------------|-------------------|--------------------|---------------------------|-------------------------|-----------------|------------------------------------------|
|                    |                          | Low egg density          | High egg density | Artificial damage | Twig diameter (mm) | Leaf nitrogen content (%) | Larval survivorship (%) | Adult mass (mg) |                                          |
| Europe             | <i>V. lantana</i>        | 87                       | 90               | 68.7              | 3.9                | 1.80                      | 49.4                    | 10.5            | 3.0                                      |
| Europe             | <i>V. opulus</i>         | 91                       | 67               | 79.3              | 3.2                | 1.98                      | 47.3                    | 12.2            | 5.1                                      |
| Europe             | <i>V. tinus</i>          | 35                       | 57.4             | —                 | 2.4                | 0.95                      | —                       | —               | —                                        |
| Asia               | <i>V. carlesii</i>       | 77.2                     | 28               | 36.8              | 2.2                | 1.60                      | 1.1                     | 7.8             | 0.5                                      |
| Asia               | <i>V. dilatatum</i>      | —                        | —                | —                 | 2.6                | 1.85                      | 0.0                     | —               | —                                        |
| Asia               | <i>V. macrocephalum</i>  | 90                       | 57               | 36.0              | 2.2                | 1.65                      | 33.0                    | 8.1             | 0.5                                      |
| Asia               | <i>V. plicatum</i>       | 80                       | —                | 17.0              | 2.7                | 1.60                      | 0.0                     | —               | 0.5                                      |
| Asia               | <i>V. rhytidophyllum</i> | 83                       | —                | 58.3              | 3.7                | 1.88                      | 29.5                    | 7.8             | 0.1                                      |
| Asia               | <i>V. sargentii</i>      | 87                       | 49               | 76.3              | 3.0                | 1.88                      | 47.6                    | 11.7            | 6.1                                      |
| Asia               | <i>V. setigerum</i>      | 80                       | 77               | 68.3              | 3.3                | 1.83                      | 14.9                    | 9.4             | 0.6                                      |
| Asia               | <i>V. sieboldii</i>      | 98                       | —                | 38.5              | 3.8                | 1.78                      | 16.9                    | 8.5             | 0.5                                      |
| N. America         | <i>V. dentatum</i>       | 65                       | 24               | 37.0              | 1.9                | 2.55                      | 28.9                    | 12.1            | 6.0                                      |
| N. America         | <i>V. lentago</i>        | 96                       | 16               | 7.1               | 2.7                | 1.78                      | 14.3                    | 9.0             | 1.3                                      |
| N. America         | <i>V. nudum</i>          | 31                       | 24               | 4.7               | 2.1                | 1.60                      | —                       | —               | —                                        |
| N. America         | <i>V. prunifolium</i>    | 100                      | 24               | 4.0               | 2.6                | 1.25                      | 29.2                    | 9.5             | 1.7                                      |
| N. America         | <i>V. rafinesquianum</i> | 75                       | 12               | 11.4              | 2.4                | 1.38                      | 38.8                    | 9.9             | —                                        |
| N. America         | <i>V. trilobum</i>       | 64                       | 38               | 42.7              | 2.9                | 2.05                      | 50.2                    | 11.5            | 4.8                                      |

—, missing data.
